1 **Title**

2

3 **Drift and directional selection are the evolutionary forces driving gene expression**  
4 **divergence in eye and brain tissue of *Heliconius* butterflies.**

5

6 Ana Catalán<sup>1,3</sup>, Adriana Briscoe<sup>2</sup>, Sebastian Höhna<sup>3,4</sup>.

7 <sup>1</sup> Department of Evolutionary Biology, Evolutionary Biology Centre (EBC), Uppsala  
8 University, Norbyvägen 14-18 75236, Uppsala, Sweden.

9 <sup>2</sup> Department of Ecology and Evolutionary Biology, University of California, Irvine, CA  
10 92697, USA.

11 <sup>3</sup> Division of Evolutionary Biology, Ludwig-Maximilians-Universität München,  
12 Grosshaderner Straße 2, Planegg-Martinsried 82152, Germany.

13 <sup>4</sup> GeoBio-Center, Ludwig-Maximilians-Universität München, Richard-Wagner Str. 10,  
14 80333 Munich, Germany

15

16 Corresponding author: ana.catalan@gmail.com

17

18 **Key words:** Brownian motion, natural selection, stabilizing selection, Ornstein-  
19 Uhlenbeck, RevBayes.

20

21

22

23

## 24 **Abstract**

25 Investigating gene expression evolution over micro- and macroevolutionary  
26 timescales will expand our understanding of the role of gene expression in  
27 adaptation and speciation. In this study, we characterized which evolutionary forces  
28 are acting on gene expression levels in eye and brain tissue of five *Heliconius*  
29 butterflies with divergence times of ~5-12 MYA. We developed and applied  
30 Brownian motion and Ornstein-Uhlenbeck models to identify genes whose  
31 expression levels are evolving through drift, stabilizing selection, or a lineage-  
32 specific shift. We find that 81% of the genes evolve under genetic drift. When testing for  
33 branch-specific shifts in gene expression, we detected 368 (16%) shift events. Genes  
34 showing a shift towards up-regulation have significantly lower gene expression variance  
35 than those genes showing a shift leading towards down-regulation. We hypothesize that  
36 directional selection is acting in shifts causing up-regulation, since transcription is costly.  
37 We further uncover through simulations that parameter estimation of Ornstein-Uhlenbeck  
38 models is biased when using small phylogenies and only becomes reliable with  
39 phylogenies having at least 50 taxa. Therefore, we developed a new statistical test based  
40 on Brownian motion to identify highly conserved genes (i.e., evolving under strong  
41 stabilizing selection), which comprised 3% of the orthoclusters. In conclusion, we found  
42 that drift is the dominant evolutionary force driving gene expression evolution in eye and  
43 brain tissue in *Heliconius*. Nevertheless, the higher proportion of genes evolving under  
44 directional than under stabilizing selection might reflect species-specific selective  
45 pressures on vision and brain necessary to fulfill species-specific requirements.

46

## 47 **Introduction**

48           Species and populations diverge through the accumulation of genetic changes that  
49 affect coding or non-coding genomic regions. Genetic variation affecting gene expression  
50 has the potential of changing gene expression patterns in a spatiotemporal manner, by  
51 changing gene expression profiles in specific organs and cell types at particular  
52 developmental stages (Carroll 2005; Signor and Nuzhdin 2018). This spatiotemporal  
53 attribute of gene expression might enable evolutionary change in a compartmentalized  
54 way, allowing for change where it is required but also allowing for the needed processes  
55 to remain conserved. Phenotypic diversity caused by changes in gene expression  
56 encompasses a great variety of traits, including changes affecting an organism's  
57 coloration (Nadeau 2016), size and shape (Ahi et al. 2017), as well as sensory perception  
58 and behavior, amongst other phenotypes (Lee et al. 2000; Wanner et al. 2007). Even  
59 though major advances have been made in linking gene expression variation to a  
60 phenotype (Catalán et al. 2016; Glaser-Schmitt and Parsch 2018), discerning the  
61 evolutionary forces shaping gene expression level variation among closely related species  
62 is an area that needs further research.

63           To understand the evolutionary forces acting on gene expression it is necessary to  
64 model within and between species gene expression variance. Neutral gene expression  
65 divergence between species leads to gene expression difference through divergence  
66 alone. Thus, neutral changes in gene expression modeled by random drift provides a null  
67 hypothesis to detect deviations from the expected neutral gene expression divergence. A  
68 linear relationship between divergence time and gene expression variance difference has  
69 been proposed for closely related species, assuming a clock-like (i.e., constant through

70 time) rate of gene expression divergence (Khaitovich et al. 2004; Khaitovich 2005).  
71 Another approach to studying the evolutionary forces shaping gene expression evolution,  
72 which is motivated by statistical phylogenetics, is fitting Brownian motion (BM) models.  
73 BM-models are often used to describe changes in continuous trait through time using  
74 random drift with rate  $\sigma^2$  and taking into account the known phylogeny of the taxa of  
75 interest (Felsenstein 1985). Thus, in a BM context,  $\sigma^2$  can also be described as the  
76 volatility parameter that determines the rate at which a trait's value diffuses away from its  
77 current state (Bedford and Hartl 2009). Fitting BM models to investigate gene expression  
78 evolution has shown that stabilizing selection and evolution through genetic drift can be  
79 readily characterized (Kalinka et al. 2010; Wong et al. 2015).

80 Ornstein-Uhlenbeck (OU) models have also been used to study continuous trait  
81 evolution in a phylogenetic context (Hansen 1997; Butler and King 2004). Ornstein-  
82 Uhlenbeck models, an extension to BM-models, include two extra parameters,  $\alpha$  and  $\theta$ ,  
83 for modeling the strength of stabilizing ( $\alpha$ ) selection towards a phenotypic optimum ( $\theta$ ).  
84 As in a BM context,  $\sigma^2$  is the rate at which a trait changes through time, and  $\alpha$  is the  
85 force pulling back the diffused trait to an optimum state. This is analogous to stabilizing  
86 selection pulling back a trait to its optimum value after having experienced a departure  
87 from it. Theta ( $\theta$ ) is described as the trait's optimum state at a particular time point  
88 toward which the pull of  $\alpha$  is aimed (Hansen 1997; Butler and King 2004). OU-models  
89 offer a useful framework to generate hypothesis about the evolutionary forces acting on  
90 transcriptome levels, whether it is drift, stabilizing selection or directional selection  
91 (Bedford and Hartl 2009; Rohlf and Nielsen 2015; Wong et al. 2015; Chen et al. 2017;  
92 Stern and Crandall 2018).

93           In this study, we used five closely-related species of *Heliconius* butterflies to  
94 explore the evolutionary forces shaping gene expression variation in eye and brain tissue.  
95 *Heliconius charithonia*, *H. sara*, *H. erato*, *H. melpomene* and *H. doris* (Figure 1) belong  
96 to four of the seven distinct *Heliconius* phylogenetic clades with divergence times  
97 ranging from 5.5 to 11.8 MYA. Beside showing a great diversity in wing color patterns  
98 (Kronforst and Papa 2015), *Heliconius* butterflies also show a diversity of life history  
99 traits (Salcedo 2010; Merrill et al. 2015), mating systems (Beltrán et al. 2007; Walters et  
100 al. 2012) and behavior (Mendoza-Cuenca and Macías-Ordóñez 2005). Since *Heliconius*  
101 butterflies are diurnal species, visual stimuli provide key sources of information about the  
102 environment. For example, flowers and oviposition sites, potential mates or predators are  
103 all targets of interest to butterflies in which the first line of perception is visual  
104 (Finkbeiner et al. 2014; Finkbeiner et al. 2017). After visual cues are detected by the  
105 visual system, the detected information travels to the brain, where it is processed and its  
106 output can result in a specific behavior or physiological response. Thus, the brain's  
107 processing and output together with the visual system have the potential of being finely  
108 tuned according to a species' life history. In the case of *Heliconius* butterflies, a high  
109 diversity of adult compound eye retinal mosaics (between sexes and species) has been  
110 discovered (McCulloch et al. 2017), as well as species-specific differences in brain  
111 morphology (Montgomery et al. 2016). Which evolutionary forces are shaping adult eye  
112 and brain expression in *Heliconius* is one question we seek to investigate, and in that  
113 way, gain an understanding into the potential role of inter-species gene expression  
114 differences in speciation and adaptation.

115           Therefore, in this study we investigated which evolutionary forces are driving  
116 gene expression variation in eye and brain tissue. More specifically, we aimed to identify  
117 if expression variation in individual genes is evolving, for example, through drift,  
118 stabilizing selection or directional selection. To this end, we generated a set of  
119 orthoclusters shared among our five butterfly species together with expression data for  
120 each gene in each orthocluster. We characterized the selective forces acting on gene  
121 expression levels thereby revealing the fraction of the transcriptome evolving under drift,  
122 directional selection, as well stabilizing selection.

123

## 124 **Methods**

### 125 *Data set*

126           The data set used in this study was published in (Catalán et al. 2018) and retrieved  
127 from ArrayExpress: E-MTAB-6810 and Dryad data identifier: DOI: doi: 10.5061/  
128 dryad.ds21fv5. In Catalán et al (2018), whole transcriptomes were generated from eye  
129 and brain tissue combined for *Heliconius charitonia*, *H. sara*, *H. erato*, *H. doris* and *H.*  
130 *melpomene*. *De novo* transcriptome assemblies were generated for each species and the  
131 corresponding reads were mapped back to their matching transcriptome using Bowtie  
132 (version 1.0.0). Raw read counts and FPKM values were calculated for each species and  
133 used for downstream analysis. TransDecoder (version 5.0.2) was used to identify  
134 candidate coding regions from each *de novo* Trinity transcriptome. The predicted coding  
135 sequences were utilized to annotate each transcriptome by identifying orthologous hits in  
136 UniProt, Flybase and Pfam databases using blastp (2.2.30) and keeping only hits with an  
137 *e*-value < 10<sup>-3</sup> (Altschul et al. 1990; Chintapalli et al. 2007; Punta et al. 2012).

138 *Orthology assessment*

139 The set of orthoclusters used to assess gene expression evolution across  
140 *Heliconius* was retrieved from supplementary table S15 published in Catalán *et. al.* 2018.  
141 Briefly, the Unrooted Phylogenetic Orthology (UPhO) pipeline and model was used to  
142 assess orthologous relationships between the five *Heliconius* species (Ballesteros and  
143 Hormiga 2016). UPhO uses an all species pairwise blastp search and a Markov clustering  
144 algorithm (MCL) (version 1.0.0) (Enright et al. 2002) to cluster sequences according to  
145 sequence similarity. Clustered sequences were aligned with MAFFT (version 7.3.05)  
146 (Kato and Toh 2008) and curated after alignment with trimAl (version 1.3) (Capella-  
147 Gutiérrez et al. 2009). Phylogenetic inference for each sequence cluster was done using  
148 RAxML (version 8.2.10) (Stamatakis 2006) and orthology was assessed for each  
149 generated tree using the UPhO algorithm. A matrix with log<sub>2</sub> FPKM values was  
150 generated for each orthoclusters which was used to analyze gene expression variance.

151

152 *Modelling Gene Expression Evolution*

153 **Table 1.** Summary of the models implemented in this work

| Model                                  | Description                                                                   | Parameters                                       |
|----------------------------------------|-------------------------------------------------------------------------------|--------------------------------------------------|
| <b>Equal species means</b>             | All species have the same mean gene expression level.                         | $\mu$ – global mean gene expression level        |
| <b>Unequal species means</b>           | All species have their own independent mean gene expression level.            | $\mu_i$ – mean gene expression level per species |
| <b>Brownian motion (BM)</b>            | Random drift of the species mean gene expression level along the phylogeny.   | $\sigma^2$ - rate of drift                       |
| <b>Brownian motion (BM) with shift</b> | Random drift with one branch having a different rate (directional selection). | $\sigma^2_B$ - rate of drift background branch   |

|                                           |                                                                                               |                                                                                                                                                                                                                                                                       |
|-------------------------------------------|-----------------------------------------------------------------------------------------------|-----------------------------------------------------------------------------------------------------------------------------------------------------------------------------------------------------------------------------------------------------------------------|
|                                           |                                                                                               | $\sigma^2_F$ - rate of drift foreground branch                                                                                                                                                                                                                        |
| <b>Ornstein-Uhlenbeck (OU)</b>            | Stabilizing selection of the species mean gene expression level evolving along the phylogeny. | $\sigma^2$ - rate of drift<br>$\alpha$ - strength of selection<br>$\theta$ - optimal gene expression level                                                                                                                                                            |
| <b>Ornstein-Uhlenbeck (OU) with shift</b> | Directional selection due to a shift in optimal gene expression level.                        | $\sigma^2_B$ - rate of drift background branch<br>$\sigma^2_F$ - rate of drift foreground branch.<br>$\theta_B$ - optimal gene expression level background branch<br>$\theta_F$ - optimal gene expression level foreground branch<br>$\alpha$ - strength of selection |

154

155

156 To study the forces driving gene expression evolution, we implemented a set of  
 157 six different statistical models (Table 1). Each model models the mean species gene  
 158 expression level (between-species variance) and the gene expression levels of individual  
 159 samples per species (within-species variance). How these mean species gene expression  
 160 levels evolve, or not, along the phylogeny and over time, is specific and central to each  
 161 model. We estimated the parameters of each model and performed Bayesian model  
 162 selection using Bayes factors to establish which model describes the observed data best  
 163 and thus which process is most likely to drive gene expression evolution in the five  
 164 *Heliconius* species of our study (see below).

165 The simplest model of gene expression assumes that all species have the exact  
 166 same mean gene expression level. In this case, we only have one parameter  $\mu$  which  
 167 defines the mean gene expression level of all species. The expression level  $X_{ij}$  of  
 168 individual  $i$  from species  $j$  is modeled using a normal distribution with  $X_{ij} \sim \text{Norm}(\mu, \delta_i^2)$ .



169 We chose a uniform prior distribution between -20 and 20 for the mean gene expression  
170 parameter  $\mu$ . Note that we assume that every species has its own gene expression variance  
171 parameter  $\delta_i^2$  (see below). This model assumes there is no evolution of gene expression  
172 levels, i.e., gene expression levels are completely conserved among species.

173 The second model that we implemented was a model where each species has its  
174 own gene expression mean  $\mu_i$ . Thus, we model the gene expression level  $X_{ij}$  of gene  $i$  from  
175 species  $j$  using a normal distribution with  $X_{ij} \sim \text{Norm}(\mu_i, \delta_i^2)$ . In this model, each species  
176 has a different mean gene expression level, but these gene expression levels do not  
177 evolve under an evolutionary model; they are intrinsically different without any  
178 mechanistic reason (no phylogenetic signal). As with the first model, we assumed a  
179 uniform prior distribution between -20 and 20 for each mean gene expression level  $\mu$ .

180 The third model that we implemented was a phylogenetic Brownian motion  
181 model (Felsenstein 1985). We assume that any gene expression value at the root of the  
182 phylogeny is equally probable. Then, the mean gene expression levels  $\mu$  evolve along the  
183 lineages of the phylogeny. The Brownian motion model specifies that the focal variable,  
184  $\mu$  in our case, is drawn from a normal distribution centered around the value of the  
185 ancestor,  $\mu_A$ . The amount of change, i.e., rate of random drift, is defined by the parameter  
186  $\sigma^2$ . We assumed a log-uniform prior distribution between 10E-5 and 10E5 for the drift  
187 parameter  $\sigma^2$ . Thus, the mean gene expression levels  $\mu_i$  for the species of the phylogeny  
188 are distributed according to a multivariate normal distribution where the covariance  
189 structure is defined by the phylogeny (Felsenstein 1985). This means that more closely-  
190 related species are expected to have a more similar mean gene expression level because  
191 they share more evolutionary history (i.e., they are more recently diverged), which is

192 modeled by the covariance structure. Such a phylogenetic model of gene expression  
193 evolution has been applied previously by (Bedford and Hartl 2009). Importantly, the BM  
194 model only defines how the mean gene expression levels evolve but does not allow for  
195 any sample variance of the individuals of a species. Therefore, we extended the standard  
196 phylogenetic BM model to allow for within-species sample variance where again the  
197 expression level  $X_{ij}$  of individual  $i$  from species  $j$  is normally distributed with  $X_{ij} \sim$   
198  $\text{Norm}(\mu, \delta^2_i)$  where  $\delta^2_i$  is the within-species variance parameter (Ives et al. 2007; Rohlf  
199 and Nielsen 2015). This extension to allow for within-species variance was developed for  
200 all phylogenetic models (BM, BM with shift, OU and OU with shift).

201 The fourth model that we implemented was a phylogenetic BM model with  
202 branch-specific rates of evolution, thus detecting directional selection. The mean gene  
203 expression level evolves under a BM model (i.e., random drift) where the rate of  
204 evolution for branch  $k$  is given by  $\sigma^2_k$  (O'Meara et al. 2006; Eastman et al. 2011). Thus,  
205 a branch with a higher rate of evolution  $\sigma^2_k$  signifies more change in gene expression  
206 levels than under a constant rate random drift model (the BM model). Directional  
207 selection can therefore be detected by inferring an elevated estimate of  $\sigma^2_k$  compared  
208 with the background rate of drift  $\sigma^2$ . Specifically, we applied a background rate of drift  
209  $\sigma^2_B$  to all branches except the chosen foreground branch which received its own rate of  
210 drift  $\sigma^2_F$ .

211 The fifth model we implemented was a phylogenetic Ornstein-Uhlenbeck process  
212 (Hansen 1997). The Ornstein-Uhlenbeck (OU) process models, similar to BM, the  
213 evolution of the mean gene expression level per species along a phylogenetic tree.  
214 However, unlike BM, the mean expression level diffuses with rate  $\sigma^2$  and is attracted

215 with strength  $\alpha$  to an optimum level  $\theta$ . Thus, the OU process has an expected variance of  
216  $\sigma^2/2\alpha$  which is independent of time, i.e., does not increase with increasing time but  
217 instead stabilizes (c.f. Figure 10). The variance becomes small if either the strength of  
218 selection is large or the rate of drift is small. This is, in fact, a major problem for OU  
219 models which cannot distinguish if attraction (or selection) is strong or diffusion is weak  
220 (Ho and Ané 2014; Cooper et al. 2016).

221 The sixth model we implemented was an Ornstein-Uhlenbeck process with a  
222 branch-specific shift in both the rate of drift  $\sigma^2$  and the optimum gene expression level  $\theta$   
223 (Rohlf et al. 2014; Uyeda and Harmon 2014). Thus, this branch-specific OU model is  
224 analogous to the branch-specific BM model, allowing for directional selection in an OU  
225 framework. Specifically, we tested if there was a significant support for the chosen  
226 foreground branch which received its own rate of drift  $\sigma^2_F$  and optimum  $\theta_B$  to be different  
227 from the background rate of drift  $\sigma^2_B$  and optimum  $\theta_B$ . We used the same prior  
228 distributions as before and assumed that both parameters for the background and  
229 foreground branches are drawn from the identical prior distribution. This model has in  
230 total five free additional parameters along with the five nuisance parameters (the within-  
231 species variances). Thus, we expect that this model is more prone to be over-  
232 parameterized for our dataset with five species. Nevertheless, our Bayesian approach for  
233 parameter estimation and model selection integrates over parameter uncertainty and  
234 penalizes extra parameters by integrating over the prior distribution.

235

236

237

238 *Parameter Estimation and Model Selection*

239 We estimated parameters for our different models in a Bayesian statistical  
240 framework. Thus, we approximated the posterior distribution of the model parameters  
241 using Markov chain Monte Carlo sampling (Metropolis et al. 1953; Hastings 1970). We  
242 ran a separate MCMC analysis for each model and gene, 2393 analysis per model. Every  
243 model parameter was updated twice per MCMC iteration where the order of parameter  
244 updates was chosen randomly. We applied the same settings of the MCMC algorithm for  
245 each model. First, a burn-in phase of the MCMC algorithm was run for 2,000 iterations  
246 with auto-tuning every 100 iterations. Then, the actual MCMC simulation was run for  
247 50,000 iterations with sampling 10 iterations, yielding 5,000 samples from the posterior  
248 distribution (Höhna et al. 2017).

249 Model selection was performed using marginal likelihoods. Marginal likelihoods  
250 are the probability of the data for a specific model integrated over all possible parameter  
251 values. From the marginal likelihood we can then compute Bayes factors and model  
252 probabilities (i.e., weights of a model being the true model generating the data given a set  
253 of candidate models). We approximated the marginal likelihoods using stepping stone  
254 sampling (Fan et al. 2011). The stepping stone algorithm implemented in RevBayes  
255 consisted of 128 MCMC runs where each MCMC ran had the likelihood function raised  
256 to the power of  $\beta$  computed by the quantiles of a beta probability distribution (Höhna et  
257 al. 2017).

258

259

260

261 *Data availability*

262           The five different models that we used in our study are implemented in Bayesian  
263 phylogenetic inference software RevBayes v1.0.8 (Höhna et al. 2016). For efficient  
264 computations, we implemented the restricted maximum likelihood (REML) algorithm for  
265 BM models (Felsenstein 1985) and OU models (Fitzjohn 2012; Freckleton 2012). The  
266 source code and compiled executables of RevBayes are available from  
267 <https://github.com/revbayes/revbayes> and tutorials about the analyses are available from  
268 <https://revbayes.github.io/tutorials/>.

269

270 **Results**

271           To assess the evolutionary forces acting on gene expression levels in *H.*  
272 *charithonia*, *H. sara*, *H. erato*, *H. doris* and *H. melpomene* (Figure 1), we used the gene  
273 orthology dataset, composed of 2373 orthologous genes, published before (Catalán et al.  
274 2018). From this previous work, we also obtained FPKM (Fragments per Kilobase per  
275 Million mapped read) values for each gene and sample. The log<sub>2</sub> transformed FPKM  
276 values were used to build an expression matrix and to model gene expression evolution.

277

278

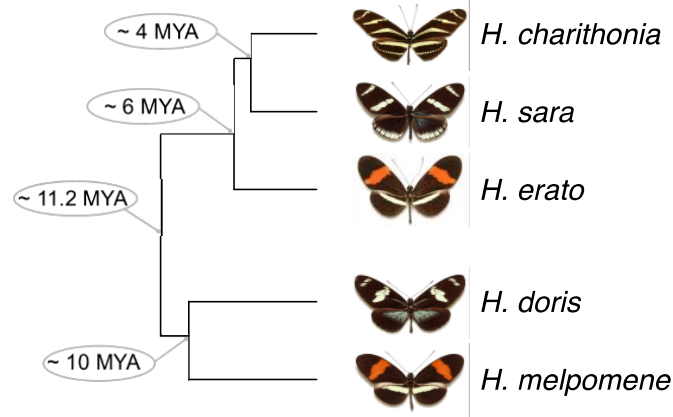

279

280 **Figure 1** Phylogenetic relationship of the *Heliconius* species used in this study showing  
281 divergence times at each node (Kozak et al. 2015).

282

283 *Testing for equality of within-species variance in gene expression levels*

284 Equality of variances among populations or samples drawn from a normal  
285 distribution is usually assumed when testing for differences in mean values obtain from  
286 continuous data or gene expression data as in our case (Warnefors and Eyre-Walker  
287 2012; Rohlf et al. 2014). Assuming equality of variances when it is not the case can lead  
288 to high Type I error rates (Gastwirth et al. 2009). To avoid assuming equality of  
289 variances, we computed the within-species variances for each orthocluster and checked  
290 for the presence of a correlation across species. From a pairwise assessment of within-  
291 species variance we found no significant correlation among all possible pairs, with  
292 Pearson's rho values ranging from 0.07 to 0.2 (Figure 2). Since gene expression variance  
293 across species is heterogeneous, hence not correlated among species, we treated within-  
294 species variance as a random variable when fitting BM and OU models.

295

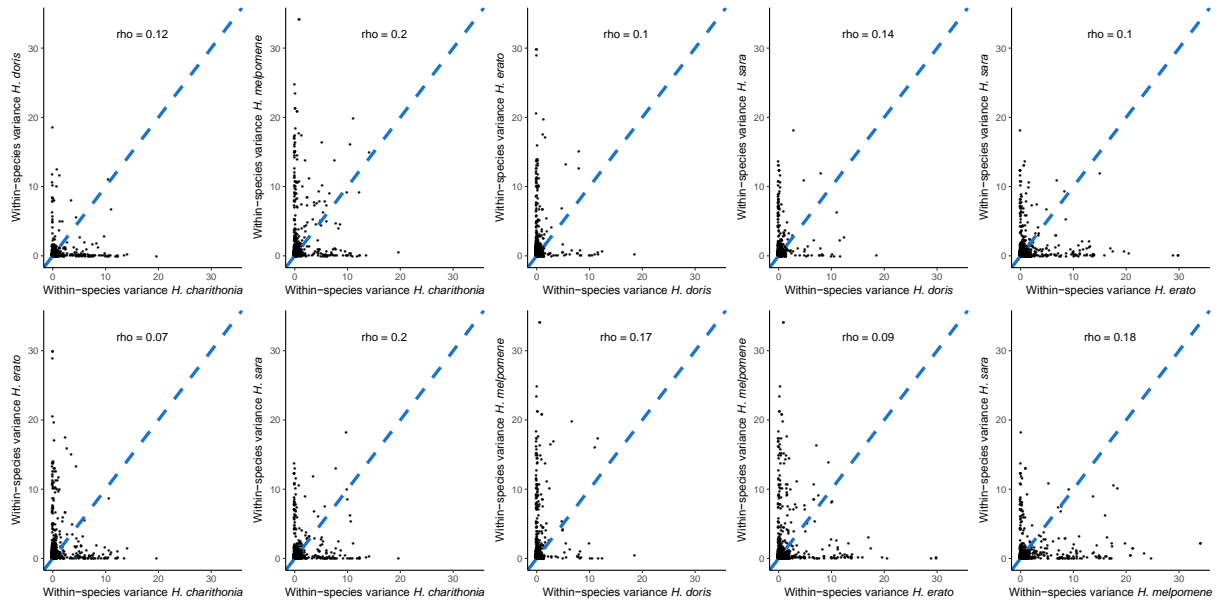

296

297 **Figure 2** Pairwise correlation between five *Heliconius* species and their gene expression  
298 within-species variance. The correlation strength between within-species variances was  
299 estimated by calculating Pearson's correlation coefficient, rho ranging from 0.07 to 0.2.

300

### 301 *Testing for gene expression evolution through drift using Brownian motion models*

302 We applied BM models to describe changes in gene expression levels through  
303 random drift. As the alternative hypotheses, we used two non-phylogenetic models where  
304 either all species had identical mean gene expression levels (Model 1) or all species had  
305 their own independent mean gene expression levels (Model 2). For each gene we  
306 computed the probability of the BM model having produced the observed data, i.e., a  
307 high probability means that it is more probable that the gene expression levels evolved  
308 under a BM model whereas a low probability means that it is more probable that the gene  
309 expression levels evolved under a non-phylogenetic model (Model 1 and Model 2). A  
310 model probability of  $>0.75$  corresponds to a Bayes factor of  $>3$  (positive support) and a  
311 model probability of  $>0.95$  corresponds to a Bayes factor of  $>20$  (strong support).

312

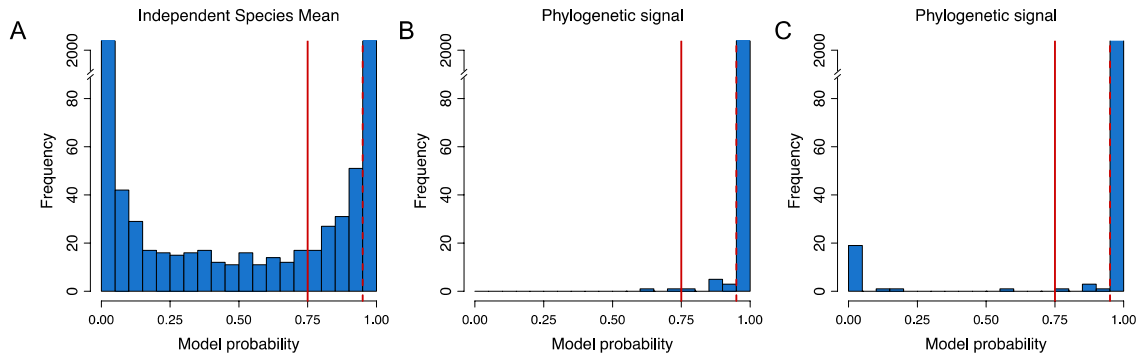

313

314 **Figure 3.** Testing for random drift in gene expression levels of *Heliconius* using  
315 Brownian motion. Significance is shown at model probability > 0.75 (solid red, Bayes  
316 factor > 3, positive support) and model probability > 0.95 (solid red, Bayes factor > 20,  
317 strong support). (A) Shows the comparison between the two non-phylogenetic models  
318 (identical vs independent species mean). (B) Shows the model probability of the BM  
319 model compared with the independent species mean model. (C) Shows the model  
320 probability of the BM model compared with the identical species mean model.

321

322 Our results show that the majority of gene expression levels (2369 out of 2393)  
323 are evolving as expected given the known *Heliconius* species phylogeny, i.e., that there is  
324 a strong phylogenetic signal (Figure 3). These results indicate that drift is the dominating  
325 evolutionary force driving transcriptome change. Only a small fraction of the  
326 orthoclusters did not show a phylogenetic signal, opening the question of the putative  
327 genetic forces shaping gene expression levels of these genes.

328

329

330



331 *Testing for conserved gene expression level*

332           The next question we explored was how prevalent conserved gene expression  
333 levels are in eye and brain tissue of *Heliconius*. This question could be answered with our  
334 previous results by computing how often Model 1, with identical species means, was  
335 recovered (Figure 2C). However, our model selection procedure relied on computing  
336 marginal likelihoods which are intrinsically sensitive to the choice of prior distribution  
337 (Berger 1990; Kass and Raftery 1995; Sinharay and Stern 2002). Therefore, we  
338 additionally performed a sensitivity analysis of  $\sigma^2 = 0$  using Monte Carlo simulation as  
339 follows (Goldman 1993). We estimated the posterior distribution of all parameters under  
340 the identical species mean model (the only parameters were the within-species variances),  
341 then we used 1,000 parameter samples from the posterior distribution to simulate gene  
342 expression datasets (e.g., a dataset consisting of a single gene with five species and 6-12  
343 individuals per species) under the identical species mean model, yielding 1,000 simulated  
344 datasets per gene in total. Then, for every gene of the 2393 genes, we estimated  $\sigma^2$  for  
345 each simulated dataset as well as the original dataset, which amounted to a total of  
346 2,395,393 MCMC analyses. Finally, we calculated if the mean posterior estimate of the  
347 empirical dataset was larger than 95% of the mean posterior estimates of the simulated  
348 datasets. In the cases when the mean posterior estimate of  $\sigma^2$  was not larger than the  
349 mean estimate of 95% of the simulated datasets we concluded that these genes are highly  
350 conserved (Figure 4).

351

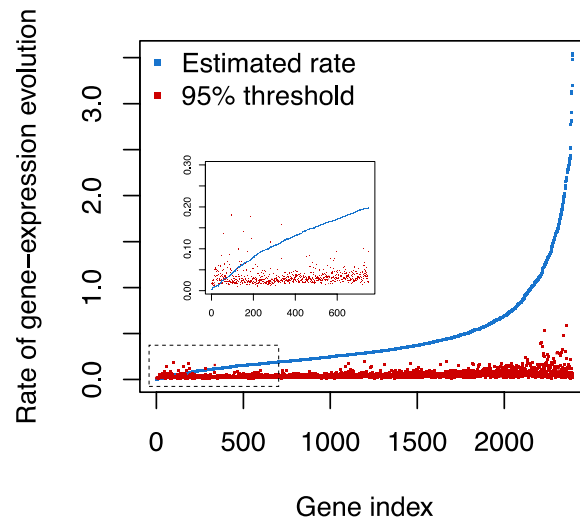

352

353 **Figure 4.** Posterior mean estimates of the drift rate  $\sigma^2$  (blue) and the 95% threshold  
354 computed (red) using Monte Carlo simulations. The genes were sorted by an ascending  
355 estimate of  $\sigma^2$ . Inset: close-up of genes whose  $\sigma^2$  is not significantly bigger than zero.

356

357 By using the described approach, we uncover a set of 83 orthoclusters whose gene  
358 expression variance across species is highly conserved (Figure 4 and Figure S1). A sigma  
359 squared not significantly different from zero, can be caused by stabilizing selection  
360 hindering gene expression divergence, resulting in more similar gene expression patterns  
361 across different *Heliconius* species.

362

363 *Testing for stabilizing selection acting on gene expression levels*

364 Subsequently, we moved forward into implementing an Ornstein-Uhlenbeck  
365 model (OU) to investigate the strength of stabilizing selection (Bedford and Hartl 2009;  
366 Rohlf et al. 2014). OU-models are an extension of BM-models, in which they include  
367 two extra parameters,  $\alpha$  and  $\theta$ . In a BM context, if  $\sigma^2$  is the rate at which a trait changes

368 through time,  $\alpha$  is then described as a force pulling back the diffused trait to an optimum  
369 state ( $\theta$ ).

370 We estimated the marginal likelihood for each gene under a BM model and an  
371 OU model. Then, we computed the probability (i.e., support) of an OU model over a BM  
372 model using the marginal likelihoods. Our results show a very low support for stabilizing  
373 selection (Figure 5). When the marginal likelihoods were examined, in 99.7% of the  
374 cases a BM model explained our expression data better than an OU-model.

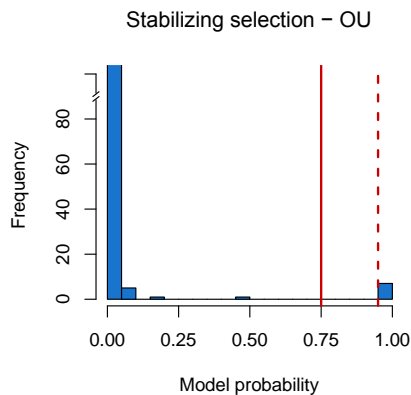

375  
376 **Figure 5.** Model probability when testing the strength of alpha when fitting an OU model  
377 for the assessment of stabilizing selection. Significance is shown at model probability >  
378 0.75 (solid red, Bayes factor > 3, positive support) and model probability > 0.95 (solid red,  
379 Bayes factor > 20, strong support). There are only 7 genes with a significant support for  
380 stabilizing selection.

381

382 *Testing the power to estimate stabilizing selection*

383 Our results indicating that very few genes evolved under stabilizing selection  
384 conflict with previous findings (Bedford and Hartl 2009). However, it has previously  
385 been discussed that when working with small phylogenies (less than ten species) there is

386 a lack of power for parameter estimation when using an OU-model (Rohlf et al. 2014).  
387 By simulating data under an OU model using phylogenies with varying numbers of taxa,  
388 we were able to show how parameter estimation is biased. The attraction parameter  $\alpha$   
389 could only be estimated closely to the true values used for the simulations when the  
390 phylogenies contained 50 or more taxa. Thus, we can observe that the bias observed for  
391 parameter estimation drops considerably when the number of taxa composing the  
392 phylogeny reaches 50 (Figure 6). This observation holds as well for the estimation of  $\sigma^2$   
393 under a range of sigma values (Figure S2). Our simulation study shows that attention  
394 needs be paid when applying OU models to assess gene expression evolution for  
395 phylogenies containing less than 50 taxa.  
396

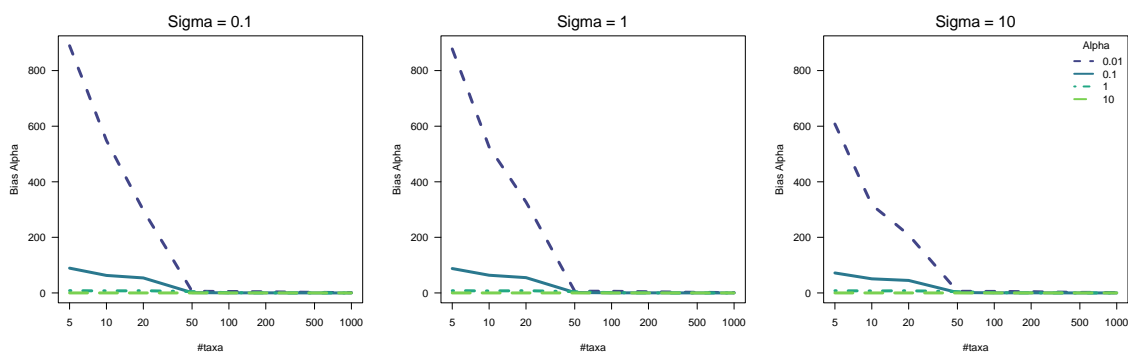

397  
398 **Figure 6.** Simulation study for the assessment of parameter estimation bias under an OU-  
399 model. The relative bias in estimates of the attraction/selection parameter ( $\alpha$ ) through  
400 1000 simulations under sigma values ranging from 0.1 – 10 and alpha values ranging  
401 from 0.01 – 10. Simulations were performed for phylogenies with sizes ranging from 5 to  
402 1000 taxa.  
403  
404

405 *Detection of branch specific shifts in gene expression*

406 To reveal genes whose gene expression patterns have putatively been shaped by  
407 directional selection, we tested for branch-specific shifts in evolutionary rates along the  
408 *Heliconius* tree. To explore branch-specific shifts in gene expression, firstly we used a  
409 BM model to test for the evolutionary rate ( $\sigma^2$ ) of a focal branch being different from the  
410 background rate (i.e., the rest of the branches in the phylogenetic tree) and assessed  
411 significance by applying Bayes factors (Figure S3 and Figure 7). Secondly, we also tested  
412 branch-specific shifts through an OU model and tested for a branch-specific shift in gene  
413 expression level optimum ( $\theta_F$ ) vs the rest of the tree's  $\theta_B$  (Figure S4).

414 With a BM approach, we were able to detect a total of 322 branch specific shifts,  
415 when considering only tip branches (Figure 7). We found 112 branch specific shifts in the  
416 HER lineage, 70 in HAS, 67 in HCH, 44 in HDO and 29 in HME (Figure 7 and Figure  
417 S4). HCH, HAS and HDO had more shifts towards a down-regulation, although only in  
418 HCH and HAS was this difference significant (sign test, HCH:  $P$ -value 6.738e-05 and  
419 HAS:  $P$ -value 1.653e-06). In HER and HME more up-regulated genes were causing a  
420 branch specific shift, although no significant difference was found.

421 When implementing an OU model we recover a total of 75 genes showing a  
422 branch specific shift in gene expression optimum (Figure 7 and Figure S4). From these  
423 genes, 55 also show a branch specific shift when implementing a BM model and 20 genes  
424 show uniquely a gene expression level shift in optimum when using an OU model (Figure  
425 S4).

426

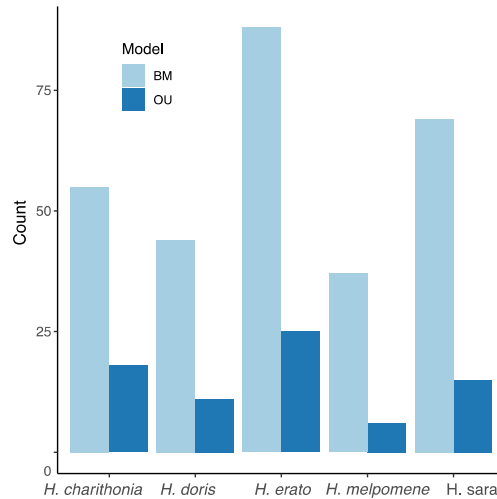

427

428 **Figure 7.** Barplot showing branch-specific shifts on gene expression levels in *Heliconius*.

429 Bars in light blue show branch shifts identified by BM and dark blue bars show branch-

430 shifts identified by OU models.

431

432 Next, we assessed within-species gene expression variance of all the genes

433 identified as having a branch-specific shift in gene expression through BM and OU

434 models. When we plotted the distribution of the within-species variance we found that

435 up-regulated genes have a significantly lower variance when compared to genes with a

436 gene expression shift towards a down-regulation (Figure 8). Different evolutionary forces

437 acting on shifts causing up- or down-regulation have the potential of maintaining

438 different levels of gene expression variation within species.

439

440

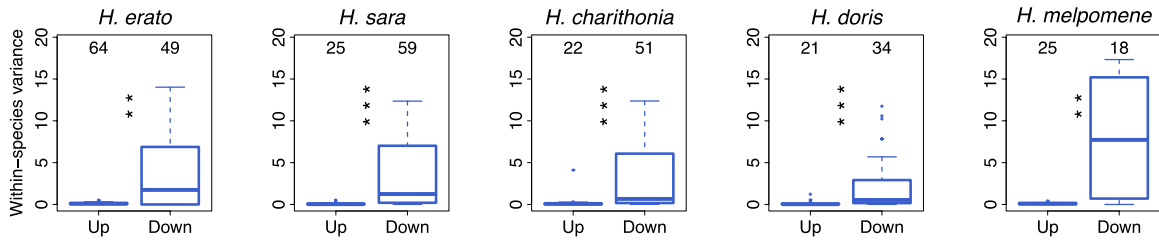

441

442 **Figure 8.** Boxplot showing the distribution of the within-species variance of gene

443 expression levels identified as having a shift towards up-regulation and shifts towards

444 down-regulation. Numbers above the boxplots show the total number of genes identified

445 with a BM and an OU model. Wilcoxon-test: \*  $P < 0.05$ , \*\*  $P < 0.01$ , \*\*\*  $P < 0.001$ .

446

## 447 Discussion

### 448 *Gene expression evolution through genetic drift*

449 Our study of the evolutionary forces acting on gene expression in eye and brain

450 tissue of *Heliconius* butterflies revealed that most transcriptome levels (81%) are

451 evolving under drift. According to neutral expectations, phenotypic changes are expected

452 to accumulate as a function of time, by drift and mutation alone (Lande 1976). As a

453 consequence, the change of transcriptomic levels through drift should reflect the

454 divergence history of the taxa of interest. From our BM analysis, we conclude that in

455 most of the gene expression levels on eye and brain a phylogenetic signal can be

456 recovered (Figure 3).

457 Consequently, we hypothesize that gene expression variation influencing

458 phenotypic variation across species mainly arises through random drift. Evolutionary

459 rates of gene expression evolution have been investigated at the population and at the

460 species level and it has been found that the proportion of the type of evolutionary force

461 acting on transcriptomic levels is not constant across taxa (Whitehead and Crawford

462 2006a; Nourmohammad et al. 2017; Stern and Crandall 2018). For example, when  
463 examining the evolutionary forces acting on gene expression levels in several fish  
464 populations, the authors reported that the dominant force driving expression changes was  
465 genetic drift (Whitehead and Crawford 2006b). Comparably, in a study concerning  
466 primates, genetic drift was the main force driving gene expression evolution (Khaitovich  
467 et al. 2005). The proportion of gene expression levels evolving by drift depends on the  
468 strength of natural selection acting on the interrogated transcriptome. For example, in a  
469 comparison between different organ types in mammals, gonad gene expression showed  
470 the lowest phylogenetic signal when compared to other organs like cerebellum or heart  
471 (Brawand et al. 2011). In *Heliconius* butterflies, other organs would need to be tested in  
472 order to get a more global understanding on how gene expression is evolving in the  
473 whole organism.

474 We explored the gene expression data further by comparing the expected gene  
475 expression divergence under a BM model to the observed data. Consequently, we  
476 simulated expression levels for 10,000 genes along the known *Heliconius* phylogeny and  
477 computed the mean of the pairwise species difference. Similarly, we computed the mean  
478 pairwise difference of the observed gene expression data. Alternatively, we can also  
479 derive the expected divergence in gene expression levels between two species over time  
480 under Brownian motion. Both species evolve under random drift and, thus, their gene  
481 expression values are normally distributed with variance  $\sigma^2 \times T$  where  $T$  is the time since  
482 the most recent common ancestor of the two species. Therefore, the difference in gene  
483 expression levels between the two species is normally distributed with variance  $2 \times \sigma^2 \times$   
484  $T$ . Since we are only interested in the absolute value of the gene expression difference,



485 we use a truncated normal distribution instead. From this truncated normal distribution  
486 with mean zero and variance  $2 \times \sigma^2 \times T$  we compute the expected gene expression  
487 difference through time (Figure 9). For the empirical data, we estimate  $\sigma^2$  using a sum of  
488 squares approach. We find that our observed gene expression data has a close fit to the  
489 simulated data (Figure 9).  
490

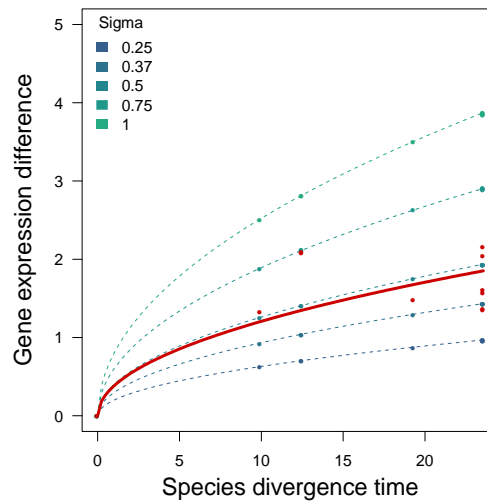

491  
492 **Figure 9.** Between species gene expression variance plotted as a function of divergence  
493 time according to the *Heliconius* phylogeny. Red:  $\sigma^2$  from gene expression levels  
494 observed in *Heliconius*. Blue: simulated gene expression difference under random drift  
495 with different values of sigma.

496

#### 497 *Gene expression evolution through genetic stabilizing selection*

498 Studies done in *Drosophila* and mammals have shown that stabilizing selection is  
499 the evolutionary force dominating gene expression evolution (Rifkin et al. 2003; Rohlf  
500 and Nielsen 2015). In contrast to these studies, in *Heliconius* we uncovered that only 3%

501 of gene expression are either highly conserved (Figure 4) or evolving through stabilizing  
502 selection (Figure 5). Factors like tissue type, gene functionality turnover or epistatic  
503 levels, have the potential to influence the degree of stabilizing selection acting on the  
504 transcriptome (Larracuenta et al. 2008; Kalinka et al. 2010; Romero et al. 2012).  
505 Additionally, in groups that have experienced an adaptive radiation, like in *Heliconius*  
506 (Kozak et al. 2015), and thus have recently experienced an elevated rate of trait  
507 evolution, directional selection might be more recurrent than stabilizing selection.

508 OU models are suitable models to study the force of stabilizing selection acting  
509 on a phenotype since the  $\alpha$  parameter simulates the strength of selection keeping a trait  
510 close to an optimum (Beaulieu et al. 2012), as several studies exemplify (Kalinka et al.  
511 2010; Brawand et al. 2011; Stern and Crandall 2018). When we applied an OU model to  
512 identify stabilizing selection on gene expression, we detected parameter estimation biases  
513 as shown by our simulation study (Figure 6). For small phylogenies, accurate parameter  
514 estimation is challenging since statistical power is weak with small sample sizes (Rohlf  
515 et al. 2014). Specifically, it is very challenging with small phylogenies to distinguish  
516 between conserved gene expression levels due to low values of drift (i.e., no change) and  
517 high values of selection (i.e., drift is removed due to selection). Not only the number of  
518 taxa, but also the depth of the phylogeny can influence the suitability of OU-models to  
519 infer stabilizing selection (Fay and Wittkopp 2008; Bedford and Hartl 2009). Therefore,  
520 we propose that for small phylogenies, testing for  $\sigma^2 = 0$  under a BM framework and  
521 assessing for significance by applying Monte Carlo simulations is a better model choice  
522 to uncover stabilizing selection. When using this approach, we identified 83 genes with  
523 conserved gene expression levels across species. These genes might be involved in

524 maintaining conserved processes that are essential for the function of eye and brain tissue  
525 in *Heliconius*. For example, from the top ten genes with the most conserved gene  
526 expression levels, we found the transcription factor *bobby sox (bbx)* (Group\_674,  
527 Appendix 1). BBX, belongs to the high mobility box domain superfamily, which are  
528 involved in transcription, replication and chromatin remodeling (Chintapalli et al. 2007).  
529 BBX has also been found to have orthologues in flies, human and mice (Nitta et al. 2015)  
530 suggesting a high essentiality of *bbx* expression. Another highly conserved orthocluster  
531 (Group 977, Appendix 1) was annotated as *glaiKit* (Chintapalli et al. 2007), which is  
532 known to be essential for the formation of epithelial polarity and nervous system  
533 development (Dunlop et al. 2004).

534 We repeated our previous data exploration by simulating 10,000 genes under an  
535 OU-model under a range of  $\sigma^2$  and  $\alpha$  values and computed the mean differences between  
536 pairs of species. We observed a reasonably good fit to our data (Figure 10). Most  
537 importantly, in Figure 10 we observed a steeper change in gene expression difference  
538 between closely related species (low evolutionary distance). Consequently, adding more  
539 species, including closely related species, to our model could not only improve OU  
540 parameter estimation but could also help in disentangling the evolutionary forces acting  
541 on gene expression divergence, specially between closely related species. Interestingly,  
542 the observed differences (red dots) in gene expression levels (which are averaged over all  
543 2393 genes) show a clear departure from the expected difference predicted by both a BM  
544 and OU model (red lines in Figure 9 and Figure 10). This could be a strong indication of  
545 gene expression divergence under different evolutionary forces (drift, stabilizing  
546 selection or directional selection).

547

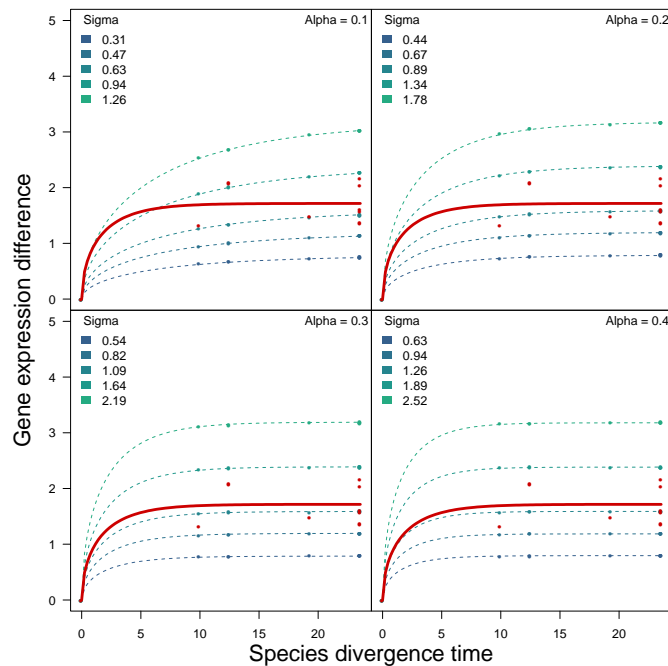

548

549 **Figure 10.** Between species gene expression variance plotted as a function of divergence  
550 time according to the *Heliconius* phylogeny. Red:  $\sigma^2$  from gene expression levels  
551 observed in *Heliconius*. Blue: simulated gene expression variance under different values  
552 of sigma. Each panel shows estimates for a different value of alpha ( $\alpha$ ).

553

#### 554 *Gene expression evolution through genetic directional selection*

555 To reveal branch-specific shifts in gene expression levels we applied BM and OU  
556 models, allowing for branch-specific shifts in the rest of the phylogeny. Using this  
557 approach, we found that 16% of the genes show a branch-specific shift, towards either  
558 up- or down-regulation, with increased expression levels showing lower variance than  
559 expected (Figure 8). The direction of gene expression shifts might be influenced by its  
560 mode of regulation. For example, in yeast it was found that regulatory mutations

561 affecting *trans*-regulatory factors were more likely to cause an increase in gene  
562 expression. Conversely, mutations on *cis*-regulatory elements were found to be skewed  
563 towards a decrease in expression (Metzger et al. 2016). On the other hand, in primates, a  
564 higher proportion of species-specific gene expression shifts were found to be towards  
565 down-regulation (Khaitovich et al. 2005). If directional selection is causing a branch-  
566 specific shift in gene expression one would expect to see a low within-species variance,  
567 whereas if the shift is caused by a relaxation of purifying selection or perhaps balancing  
568 selection, a higher within-species variance would be expected.

569         When we looked at the degree of variability between genes showing a shift  
570 towards a higher or a lower expression level, we observed that down-regulated genes  
571 have a significantly higher variance than genes showing up-regulation (Figure 8). From  
572 this observation, we hypothesize that relaxation of purifying selection might be driving  
573 the shifts causing down-regulation on gene expression, a pattern which could eventually  
574 lead to a loss of expression. However, balancing selection or experimental noise could  
575 also lead to an elevated within-species variance. Because of the cost of gene expression,  
576 it is expected that only those genes that are essential and have fitness effects will continue  
577 to be expressed, whereas genes that are not will eventually stop being transcribed (Stern  
578 and Crandall 2018). However, a shift towards down-regulation does not always have to  
579 be a consequence of relaxed purifying selection. For example, in the orthocluster with id  
580 Group\_449\_clean\_0, a 7-fold lower expression shift was detected in the branch leading to  
581 *H. doris* (Figure S5), and a significantly smaller variance than expected transcriptome-  
582 wide (Fisher's exact test,  $P$ -value < 0.001). Directional selection favoring down-  
583 regulation of gene expression can occur in a scenario where fine tuning of expression

584 levels are necessary for optimal cell or tissue function (Cayirlioglu et al. 2008; Catalán et  
585 al. 2016).

586 On the other hand, genes showing a branch-specific shift towards up-regulation  
587 have significantly lower variance when compared to expression level shifts towards  
588 down-regulation (Figure 8). This observed pattern could be a result of directional  
589 selection acting on gene expression levels leading to a reduction of the variation observed  
590 in gene expression. It is possible that in order to achieve an increase in gene expression  
591 levels, the selective forces leading to up-regulation would have to be sufficiently strong  
592 to result in a greater investment in energy allocated to transcription costs (Wagner 2005;  
593 Lang et al. 2009). Some of the genes having the most extreme branch shifts in expression,  
594 either toward a higher or a lower expression, are involved in enzymatic activity  
595 (Appendix I). Enzymes support biochemical and physiological processes helping in the  
596 optimization of tissue function (Wagner and Altenberg 1996; Feller and Gerday 1997).  
597 Thus, optimal enzymatic activity might be a key factor for species-specific brain and eye  
598 function, which in turn might be optimized for the species-specific life history and  
599 ecological environment.

600 A factor possibly influencing the proportion of transcriptome levels found to be  
601 evolving through drift, stabilizing or directional selection is the methodology used for  
602 orthology assessment. In our analysis of gene expression variation, we assessed variation  
603 in orthoclusters where an orthologous hit was found for each of our five *Heliconius*  
604 species. Genes with fast-evolving protein rates—to the point that orthology assessment  
605 becomes challenging—might also show gene expression shifts, which would not be  
606 detectable in our experimental design. For example, orthology assessment for genes

607 showing sex-biased gene expression might require an alternative method. In fact, from  
608 the orthoclusters that we identified in this study, only two included genes with sex-  
609 biased expression (Catalán et al. 2018). Additionally, gene expression shifts due to  
610 duplication events need to be explored by applying an appropriate statistical approach, as  
611 expression of genes where a duplication event has happened could contribute to the  
612 fraction of the transcriptome evolving by directional selection.

613         With this work, we have generated a set of candidate genes that are putatively  
614 evolving through directional selection and that have the potential of being involved in the  
615 processes of adaptation and speciation. To test the role of these genes in such processes,  
616 functional validation will be necessary to gain a deeper insight in the evolutionary  
617 consequences of gene expression shifts. Techniques like *in situ* hybridization, RNAi and  
618 CRISPR/Cas9 are adequate tools that can be used in shedding light into the functionality  
619 of these genes. Particularly interesting could be those genes whose gene expression levels  
620 have shifted to the degree of showing absence of expression (Figure S6). The evolution  
621 of gain and loss of gene expression across a phylogeny requires a suitable theoretical  
622 framework that should be explored particularly since such events have the potential to  
623 accelerate evolution.

624

## 625 **Acknowledgements**

626 Thanks to Aline Rangel Olguin for technical assistance with the orthocluster analysis.

627 This work was partially supported by National Science Foundation grant IOS-1656260 to

628 A.D.B and by the Knut & Alice Wallenberg Foundation to Jochen Wolf.

629

630 **References**

- 631 Ahi EP, Richter F, Sefc KM. 2017. A gene expression study of ornamental fin shape in  
632 *Neolamprologus brichardi*, an African cichlid species. *Sci Rep* 7:1–14.
- 633 Altschul SF, Gish W, Miller W, Myers EW, Lipman DJ. 1990. Basic local alignment  
634 search tool. *J Mol Biol* 215:403–410.
- 635 Ballesteros JA, Hormiga G. 2016. A new orthology assessment method for phylogenomic  
636 data: Unrooted Phylogenetic Orthology. *Mol Biol Evol* 33:1–18.
- 637 Beaulieu JM, Jhweung DC, Boettiger C, O’Meara BC. 2012. Modeling stabilizing  
638 selection: Expanding the Ornstein-Uhlenbeck model of adaptive evolution.  
639 *Evolution (N Y)* 66:2369–2383.
- 640 Bedford T, Hartl DL. 2009. Optimization of gene expression by natural selection. *Proc*  
641 *Natl Acad Sci U S A* 106:1133–1138.
- 642 Beltrán M, Jiggins C, Brower A, Bermingham E, Mallet J. 2007. Do pollen feeding and  
643 pupal-mating have a single origin in *Heliconius*? Inferences from multilocus  
644 sequence data. *Biol J Linn Soc* 92:221–239.
- 645 Berger JO. 1990. Robust bayesian. *J Stat Plan Inference* 25:303–328.
- 646 Brawand D, Soumillon M, Necsulea A, Julien P, Csárdi G, Harrigan P, Weier M, Liechti  
647 A, Aximu-Petri A, Kircher M, et al. 2011. The evolution of gene expression levels  
648 in mammalian organs. *Nature* 478:343–348.
- 649 Butler MA, King AA. 2004. Phylogenetic Comparative Analysis: A Modeling Approach  
650 for Adaptive Evolution. *Am Nat* 164:683–695.
- 651 Capella-Gutiérrez S, Silla-Martínez JM, Gabaldón T. 2009. trimAl: A tool for automated  
652 alignment trimming in large-scale phylogenetic analyses. *Bioinformatics* 25:1972–



- 653 1973.
- 654 Carroll SB. 2005. Evolution at two levels: on genes and form. PLoS Biol 3:e245.
- 655 Catalán A, Glaser-Schmitt A, Argyridou E, Duchon P, Parsch J. 2016. An Indel  
656 Polymorphism in the *MtnA* 3' Untranslated Region Is Associated with Gene  
657 Expression Variation and Local Adaptation in *Drosophila melanogaster*. PLOS  
658 Genet 12:1–24.
- 659 Catalán A, Macias-Muñoz A, Briscoe AD. 2018. Evolution of Sex-Biased Gene  
660 Expression and Dosage Compensation in the Eye and Brain of *Heliconius*  
661 Butterflies. Mol Biol Evol 35:2120–2134.
- 662 Cayirlioglu P, Kadow IG, Zhan X, Okamura K, Suh GSB, Gunning D, Lai EC, Zipursky  
663 SL. 2008. Hybrid neurons in a microRNA mutant are putative evolutionary  
664 intermediates in insect CO<sub>2</sub> sensory systems. Science (80- ) 510:3–8.
- 665 Chen J, Swofford R, Johnson J, Cummings BB, Rogel N, Lindblad-Toh K, Haerty W,  
666 Palma F di, Regev A. 2017. A quantitative model for characterizing the evolutionary  
667 history of mammalian gene expression. bioRxiv:229096.
- 668 Chintapalli VR, Wang J, Dow JAT. 2007. Using FlyAtlas to identify better *Drosophila*  
669 *melanogaster* models of human disease. Nat Genet 39:715–720.
- 670 Cooper N, Thomas GH, Venditti C, Meade A, Freckleton RP. 2016. A cautionary note on  
671 the use of Ornstein Uhlenbeck models in macroevolutionary studies. Biol J Linn Soc  
672 118:64–77.
- 673 Dunlop J, Morin X, Corominas M, Serras F, Tear G. 2004. *glaukit* is essential for the  
674 formation of epithelial polarity and neuronal development. Curr Biol 14:2039–2045.
- 675 Eastman JM, Alfaro ME, Joyce P, Hipp AL, Harmon LJ. 2011. A Novel comparative

- 676 method for identifying shifts in the rate of character evolution on trees. *Evolution* (N  
677 Y) 65:3578–3589.
- 678 Enright AJ, Van Dongen S, Ouzounis CA. 2002. An efficient algorithm for large-scale  
679 detection of protein families. *Nucleic Acids Res* 30:1575–1584.
- 680 Fan Y, Wu R, Chen MH, Kuo L, Lewis PO. 2011. Choosing among partition models in  
681 Bayesian phylogenetics. *Mol Biol Evol* 28:523–532.
- 682 Fay JC, Wittkopp PJ. 2008. Evaluating the role of natural selection in the evolution of  
683 gene regulation. *Heredity* (Edinb) 100:191–199.
- 684 Feller G, Gerday C. 1997. Psychrophilic enzymes: Molecular basis of cold adaptation.  
685 *Cell Mol Life Sci* 53:830–841.
- 686 Felsenstein J. 1985. Phylogenies and the comparative method. *Am Nat* 125:1–15.
- 687 Finkbeiner SD, Briscoe AD, Reed RD. 2014. Warning signals are seductive: relative  
688 contributions of color and pattern to predator avoidance and mate attraction in  
689 *Heliconius* butterflies. *Evolution* 68:3410–3420.
- 690 Finkbeiner SD, Fishman DA, Osorio D, Briscoe AD. 2017. Ultraviolet and yellow  
691 reflectance but not fluorescence is important for visual discrimination of  
692 conspecifics by *Heliconius erato*. *J Exp Biol*:jeb.153593.
- 693 Fitzjohn RG. 2012. Diversitree: Comparative phylogenetic analyses of diversification in  
694 R. *Methods Ecol Evol* 3:1084–1092.
- 695 Freckleton RP. 2012. Fast likelihood calculations for comparative analyses. *Methods*  
696 *Ecol Evol* 3:940–947.
- 697 Gastwirth JL, Gel YR, Miao W. 2009. The Impact of Levene’s Test of Equality of  
698 Variances on Statistical Theory and Practice. *Stat Sci* 24:343–360.

- 699 Glaser-Schmitt A, Parsch J. 2018. Functional characterization of adaptive variation  
700 within a *cis*-regulatory element influencing *Drosophila melanogaster* growth. PLoS  
701 Biol 16:1–28.
- 702 Goldman N. 1993. Simple diagnostic statistical tests of models for DNA substitution. J  
703 Mol Evol 36:182–198.
- 704 Hansen TF. 1997. Stabilizing Selection and the Comparative Analysis of Adaptation.  
705 Evolution (N Y) 51:1341.
- 706 Hastings WK. 1970. Monte Carlo simulation methods using Markov Chains and their  
707 applications. Biometrika 57:97–109.
- 708 Ho LST, Ané C. 2014. Intrinsic inference difficulties for trait evolution with Ornstein-  
709 Uhlenbeck models. Methods Ecol Evol 5:1133–1146.
- 710 Höhna S, Landis MJ, Heath TA. 2017. Phylogenetic inference using RevBayes. Curr  
711 Protoc Bioinforma 2017:6.16.1-6.16.34.
- 712 Höhna S, Landis MJ, Heath TA, Boussau B, Lartillot N, Moore BR, Huelsenbeck JP,  
713 Ronquist F. 2016. RevBayes: Bayesian phylogenetic inference using graphical  
714 models and an interactive model-specification language. Syst Biol 65:726–736.
- 715 Ives AR, Midford PE, Garland T. 2007. Within-species variation and measurement error  
716 in phylogenetic comparative methods. Syst Biol 56:252–270.
- 717 Kalinka AT, Varga KM, Gerrard DT, Preibisch S, Corcoran DL, Jarrells J, Ohler U,  
718 Bergman CM, Tomancak P. 2010. Gene expression divergence recapitulates the  
719 developmental hourglass model. Nature 468:811–814.
- 720 Kass KE, Raftery AE. 1995. Bayes Factors. J Am Stat Assoc 90:773–795.
- 721 Katoh K, Toh H. 2008. Recent developments in the MAFFT multiple sequence alignment

- 722 program. *Brief Bioinform* 9:286–298.
- 723 Khaitovich P. 2005. Parallel patterns of evolution in the genomes and transcriptomes of  
724 humans and chimpanzees. *Science* (80- ) 309:1850–1854.
- 725 Khaitovich P, Pääbo S, Weiss G. 2005. Toward a neutral evolutionary model of gene  
726 expression. *Genetics* 170:929–939.
- 727 Khaitovich P, Weiss G, Lachmann M, Hellmann I, Enard W, Muetzel B, Wirkner U,  
728 Ansorge W, Pääbo S. 2004. A neutral model of transcriptome evolution. *PLoS Biol*  
729 2.
- 730 Kozak KM, Wahlberg N, Neild AFE, Dasmahapatra KK, Mallet J, Jiggins CD. 2015.  
731 Multilocus species trees show the recent adaptive radiation of the mimetic  
732 *Heliconius* butterflies. *Syst Biol* 64:505–524.
- 733 Kronforst MR, Papa R. 2015. The functional basis of wing patterning in *Heliconius*  
734 butterflies: The molecules behind mimicry. *Genetics* 200:1–19.
- 735 Lande R. 1976. Natural Selection and Random Genetic Drift in Phenotypic Evolution.  
736 *Evolution* (N Y) 30:314–334.
- 737 Lang GI, Murray AW, Botstein D. 2009. The cost of gene expression underlies a fitness  
738 trade-off in yeast. *Proc Natl Acad Sci* 106:5755–5760.
- 739 Larracuente AM, Sackton TB, Greenberg AJ, Wong A, Singh ND, Sturgill D, Zhang Y,  
740 Oliver B, Clark AG. 2008. Evolution of protein-coding genes in *Drosophila*. *Trends*  
741 *Genet* 24:114–123.
- 742 Lee G, Foss M, Goodwin SF, Carlo T, Taylor BJ, Hall JC. 2000. Spatial, temporal, and  
743 sexually dimorphic expression patterns of the fruitless gene in the *Drosophila*  
744 central nervous system. *J Neurobiol* 43:404–426.

- 745 McCulloch KJ, Yuan F, Zhen Y, Aardema ML, Smith G, Llorente-Bousquets J,  
746 Andolfatto P, Briscoe AD. 2017. Sexual Dimorphism and Retinal Mosaic  
747 Diversification Following the Evolution of a Violet Receptor in Butterflies. *Mol*  
748 *Biol Evol* 34:1–14.
- 749 Mendoza-Cuenca L, Macías-Ordóñez R. 2005. Foraging polymorphism in *Heliconius*  
750 *charitonia* (Lepidoptera: Nymphalidae): morphological constraints and behavioural  
751 compensation. *J Trop Ecol* 21:407–415.
- 752 Merrill RM, Dasmahapatra KK, Davey JW, Dell’Aglia DD, Hanly JJ, Huber B, Jiggins  
753 CD, Joron M, Kozak KM, Llaurens V, et al. 2015. The diversification of *Heliconius*  
754 butterflies: What have we learned in 150 years? *J Evol Biol* 28:1417–1438.
- 755 Metropolis N, Rosenbluth AW, Rosenbluth MN, Teller AH, Teller E. 1953. Equation of  
756 state calculations by fast computing machines. *J Chem Phys* 21:1087–1092.
- 757 Metzger BPH, Duveau F, Yuan DC, Tryban S, Yang B, Wittkopp PJ. 2016. Contrasting  
758 Frequencies and Effects of *cis*- and *trans*-Regulatory Mutations Affecting Gene  
759 Expression. *Mol Biol Evol* 33:1131–1146.
- 760 Montgomery SH, Merrill RM, Ott SR. 2016. Brain composition in *Heliconius* butterflies,  
761 posteclosion growth and experience-dependent neuropil plasticity. *J Comp Neurol*  
762 524:1747–1769.
- 763 Nadeau NJ. 2016. Genes controlling mimetic colour pattern variation in butterflies. *Curr*  
764 *Opin Insect Sci* 17:24–31.
- 765 Nitta KR, Jolma A, Yin Y, Morgunova E, Kivioja T, Akhtar J, Hens K, Toivonen J,  
766 Deplancke B, Furlong EEM, et al. 2015. Conservation of transcription factor  
767 binding specificities across 600 million years of bilateria evolution. *Elife* 2015:1–20.

- 768 Nourmohammad A, Rambeau J, Held T, Kovacova V, Berg J, Lässig M. 2017. Adaptive  
769 evolution of gene expression in *Drosophila*. *Cell Rep* 20:1385–1395.
- 770 O’Meara BC, Ané C, Sanderson MJ, Wainwright PC. 2006. Testing for different rates of  
771 continuous trait evolution using likelihood. *Evolution* (N Y) 60:922–933.
- 772 Punta M, Cogill P, Eberhardt R, Mistry J, Tate J, Boursnell C, Pang N, Forslund K,  
773 Ceric G, Clements J, et al. 2012. The Pfam protein families databases. *Nucleic Acids*  
774 *Res* 30:1–12.
- 775 Rifkin SA, Kim J, White KP. 2003. Evolution of gene expression in the *Drosophila*  
776 *melanogaster* subgroup. *Nat Genet* 33:138–144.
- 777 Rohlf R V., Harrigan P, Nielsen R. 2014. Modeling gene expression evolution with an  
778 extended Ornstein-Uhlenbeck process accounting for within-species variation. *Mol*  
779 *Biol Evol* 31:201–211.
- 780 Rohlf R V., Nielsen R. 2015. Phylogenetic ANOVA: The expression variance and  
781 evolution model for quantitative trait evolution. *Syst Biol* 64:695–708.
- 782 Romero IG, Ruvinsky I, Gilad Y. 2012. Comparative studies of gene expression and the  
783 evolution of gene regulation. *Nat Rev Genet* 13:505–516.
- 784 Salcedo C. 2010. Environmental Elements Involved in Communal Roosting in *Heliconius*  
785 Butterflies (Lepidoptera: Nymphalidae). *Environ Entomol* 39:907–911.
- 786 Signor SA, Nuzhdin S V. 2018. The evolution of gene expression in *cis* and *trans*. *Trends*  
787 *Genet*:1–13.
- 788 Sinharay S, Stern HS. 2002. On the sensitivity of Bayes factors to the prior distributions.  
789 *Am Stat* 56:196–201.
- 790 Stamatakis A. 2006. RAxML-VI-HPC: Maximum likelihood-based phylogenetic

- 791 analyses with thousands of taxa and mixed models. *Bioinformatics* 22:2688–2690.
- 792 Stern DB, Crandall KA. 2018. The Evolution of Gene Expression Underlying Vision  
793 Loss in Cave Animals. *Mol Biol Evol* 35:2005–2014.
- 794 Uyeda JC, Harmon LJ. 2014. A novel Bayesian method for inferring and interpreting the  
795 dynamics of adaptive landscapes from phylogenetic comparative data. *Syst Biol*  
796 63:902–918.
- 797 Wagner A. 2005. Energy constraints on the evolution of gene expression. *Mol Biol Evol*  
798 22:1365–1374.
- 799 Wagner GP, Altenberg L. 1996. Complex Adaptations and the Evolution of  
800 Evolvability. *Evolution* (N Y) 50:967–976.
- 801 Walters JR, Stafford C, Hardcastle TJ, Jiggins CD. 2012. Evaluating female remating  
802 rates in light of spermatophore degradation in *Heliconius* butterflies: Pupal-mating  
803 monandry versus adult-mating polyandry. *Ecol Entomol* 37:257–268.
- 804 Wanner KW, Anderson AR, Trowell SC, Theilmann DA, Robertson HM, Newcomb RD.  
805 2007. Female-biased expression of odourant receptor genes in the adult antennae of  
806 the silkworm, *Bombyx mori*. *Insect Mol Biol* 16:107–119.
- 807 Warnefors M, Eyre-Walker A. 2012. A selection index for gene expression evolution and  
808 its application to the divergence between humans and chimpanzees. *PLoS One* 7.
- 809 Whitehead A, Crawford DL. 2006a. Variation within and among species in gene  
810 expression: Raw material for evolution. *Mol Ecol* 15:1197–1211.
- 811 Whitehead A, Crawford DL. 2006b. Neutral and adaptive variation in gene expression.  
812 *Proc Natl Acad Sci* 103:5425–5430.
- 813 Wong ES, Thybert D, Schmitt BM, Stefflova K, Odom DT, Flicek P. 2015. Decoupling

814 of evolutionary changes in transcription factor binding and gene expression in  
815 mammals. *Genome Res* 25:167–178.  
816
